# Supplementary figures and images for: The somatic mutational landscape and role of the ARID1A gene in hepatocellular carcinoma
Source: PubMed Central journal article supplement — Heliyon. 2023 Mar 8;9(3):e14307. doi: 10.1016/j.heliyon.2023.e14307 (PMC10025035; doi:10.1016/j.heliyon.2023.e14307), 2023-03-08

**a**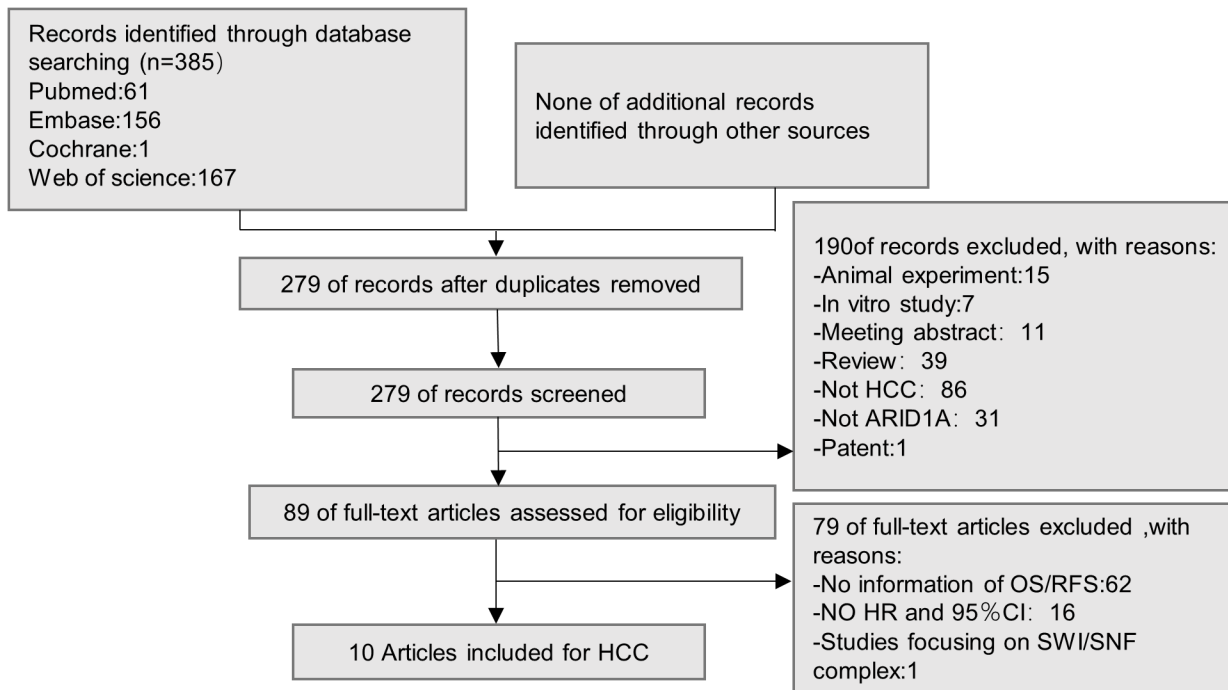**b**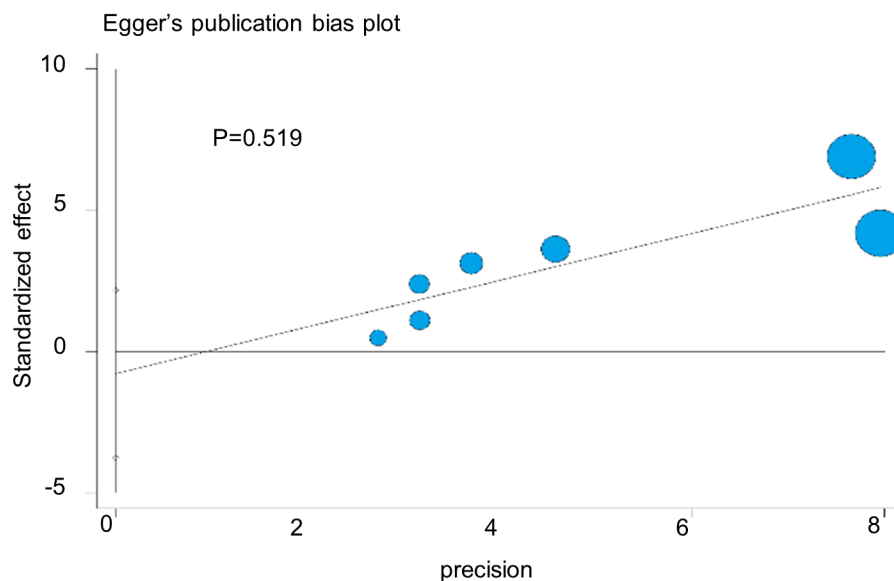

Supplement: mmc1.pdf [file mmc1.pdf]

**a**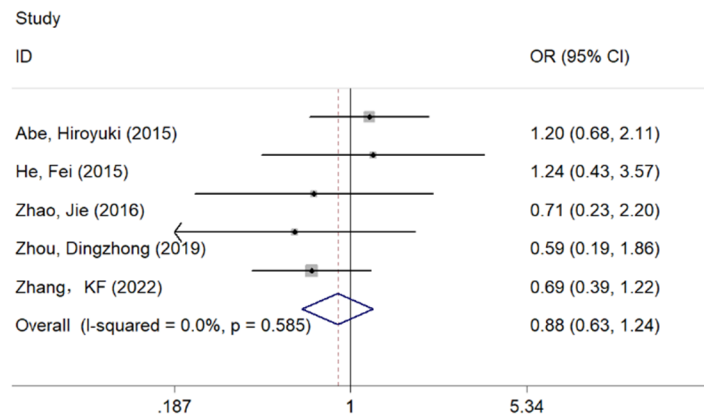**b**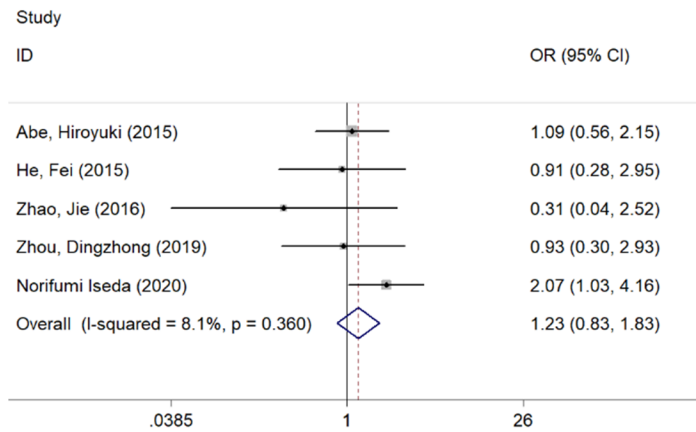**c**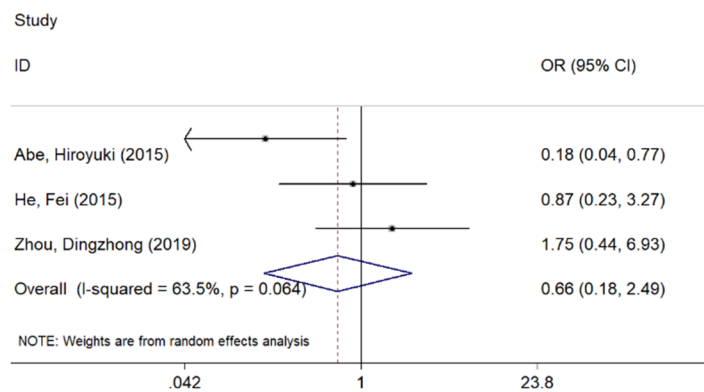**d**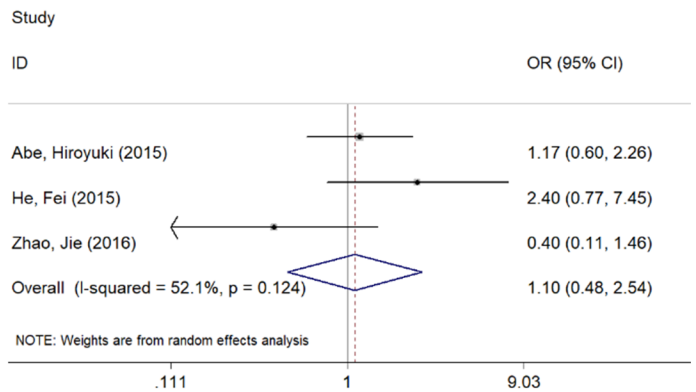**e**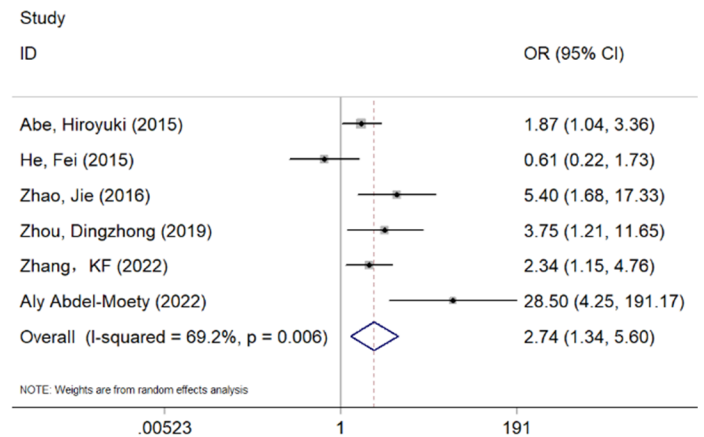**f**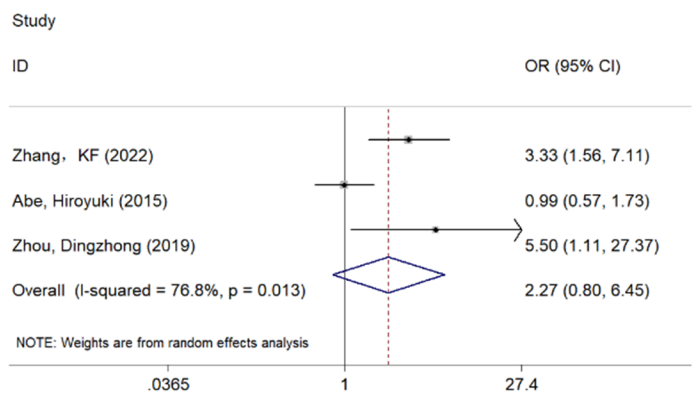**g**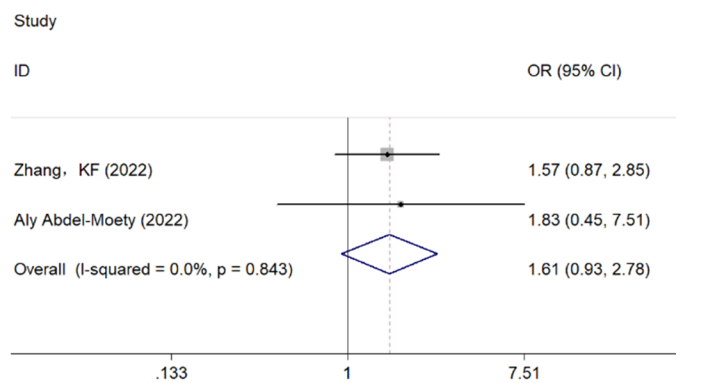**h**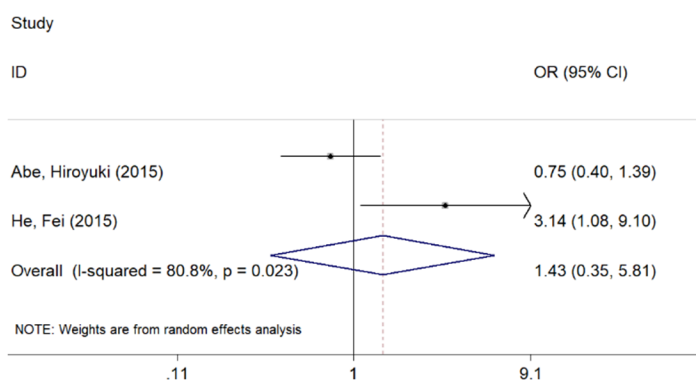

Supplement: mmc2.pdf [file mmc2.pdf]

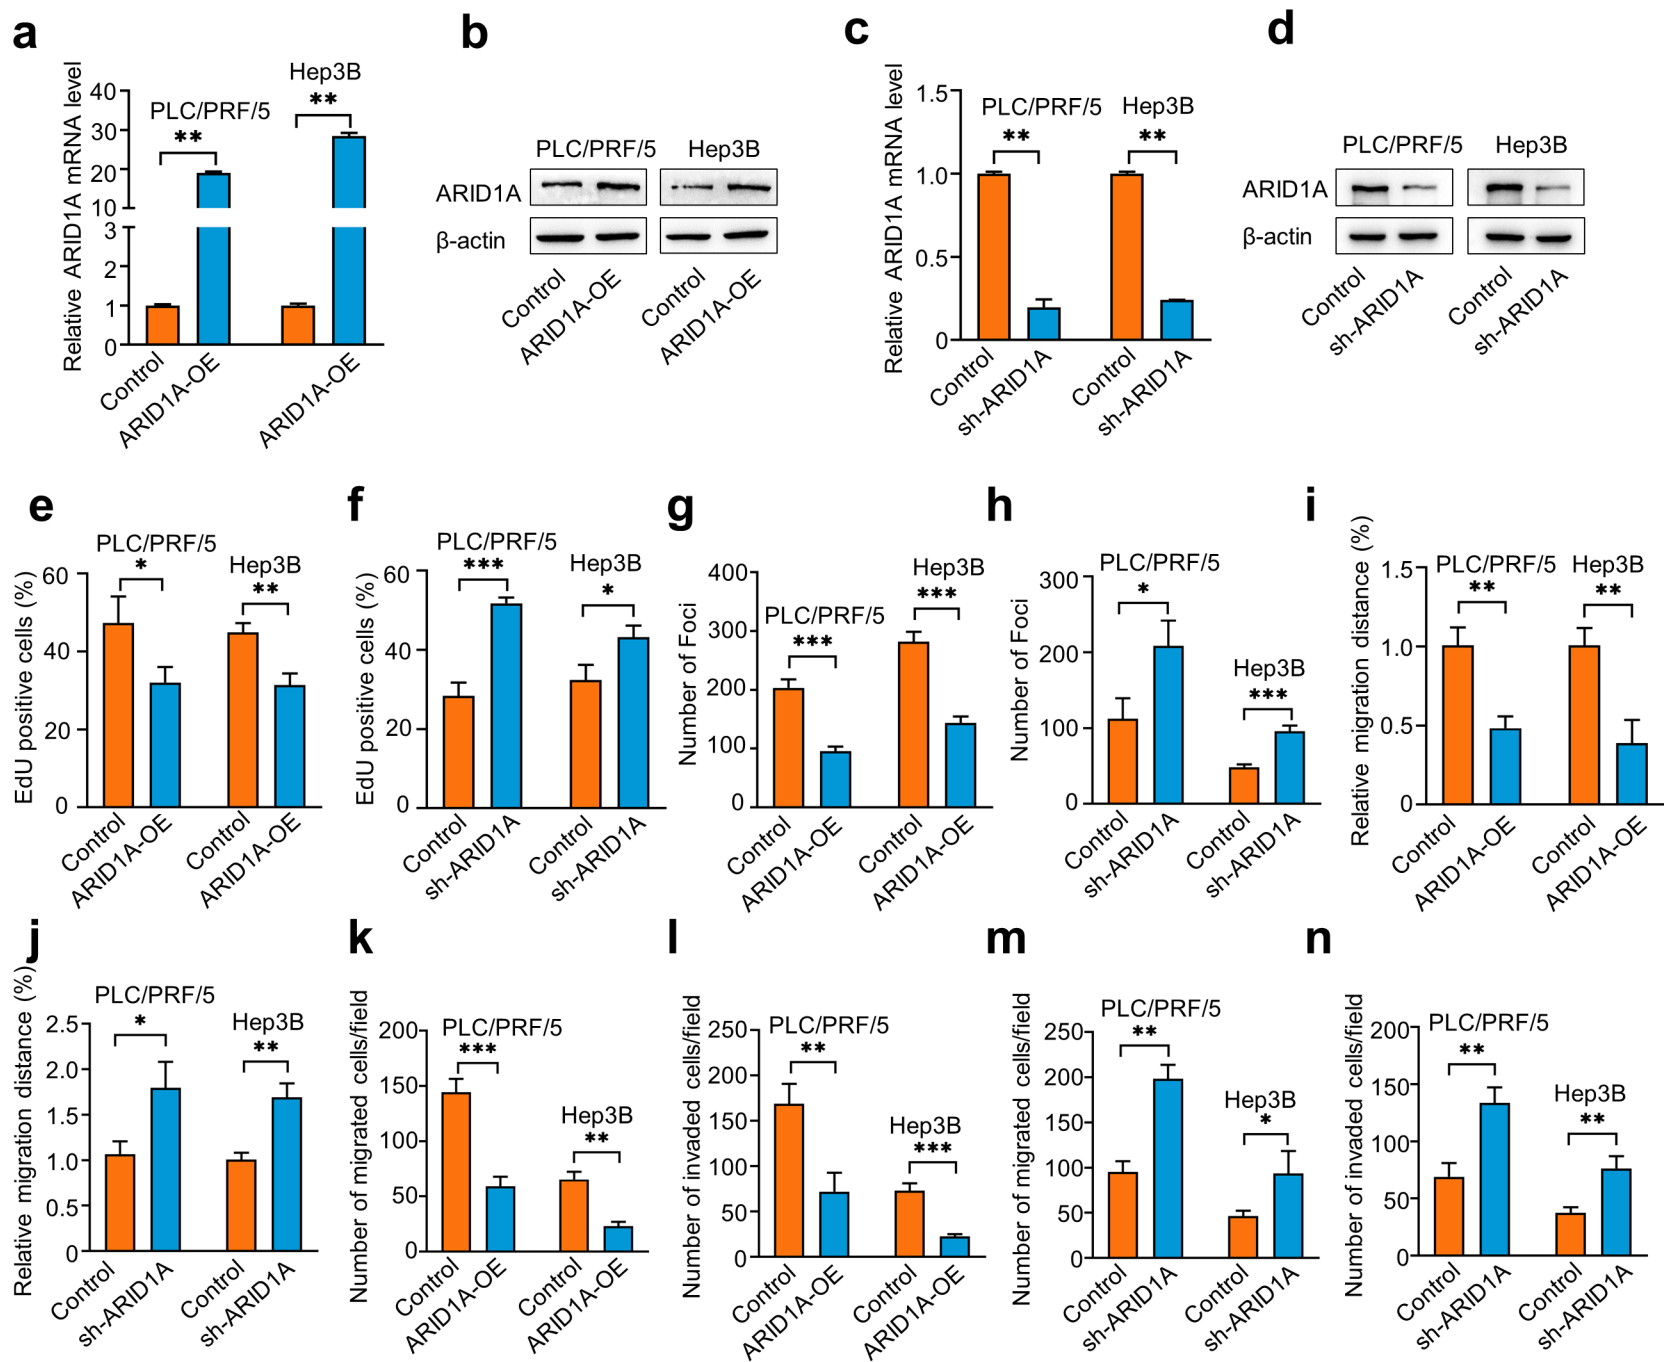

Supplement: mmc3.pdf [file mmc3.pdf]

**a**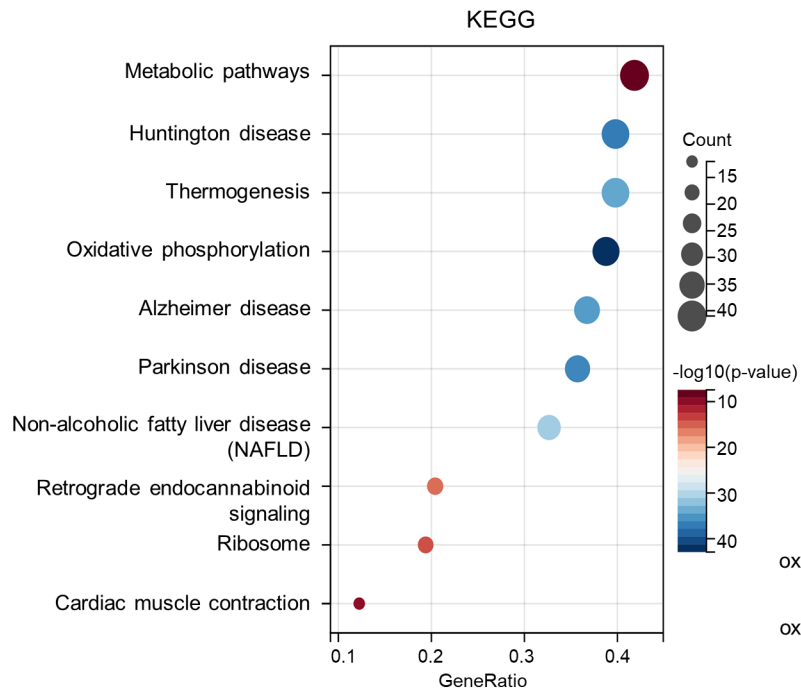**b**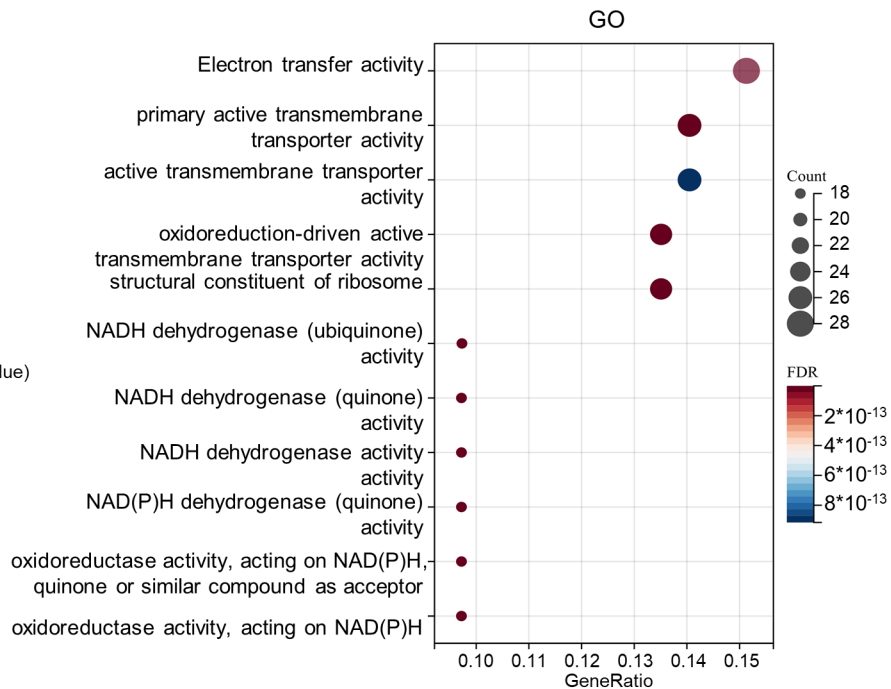

Supplement: mmc4.pdf [file mmc4.pdf]

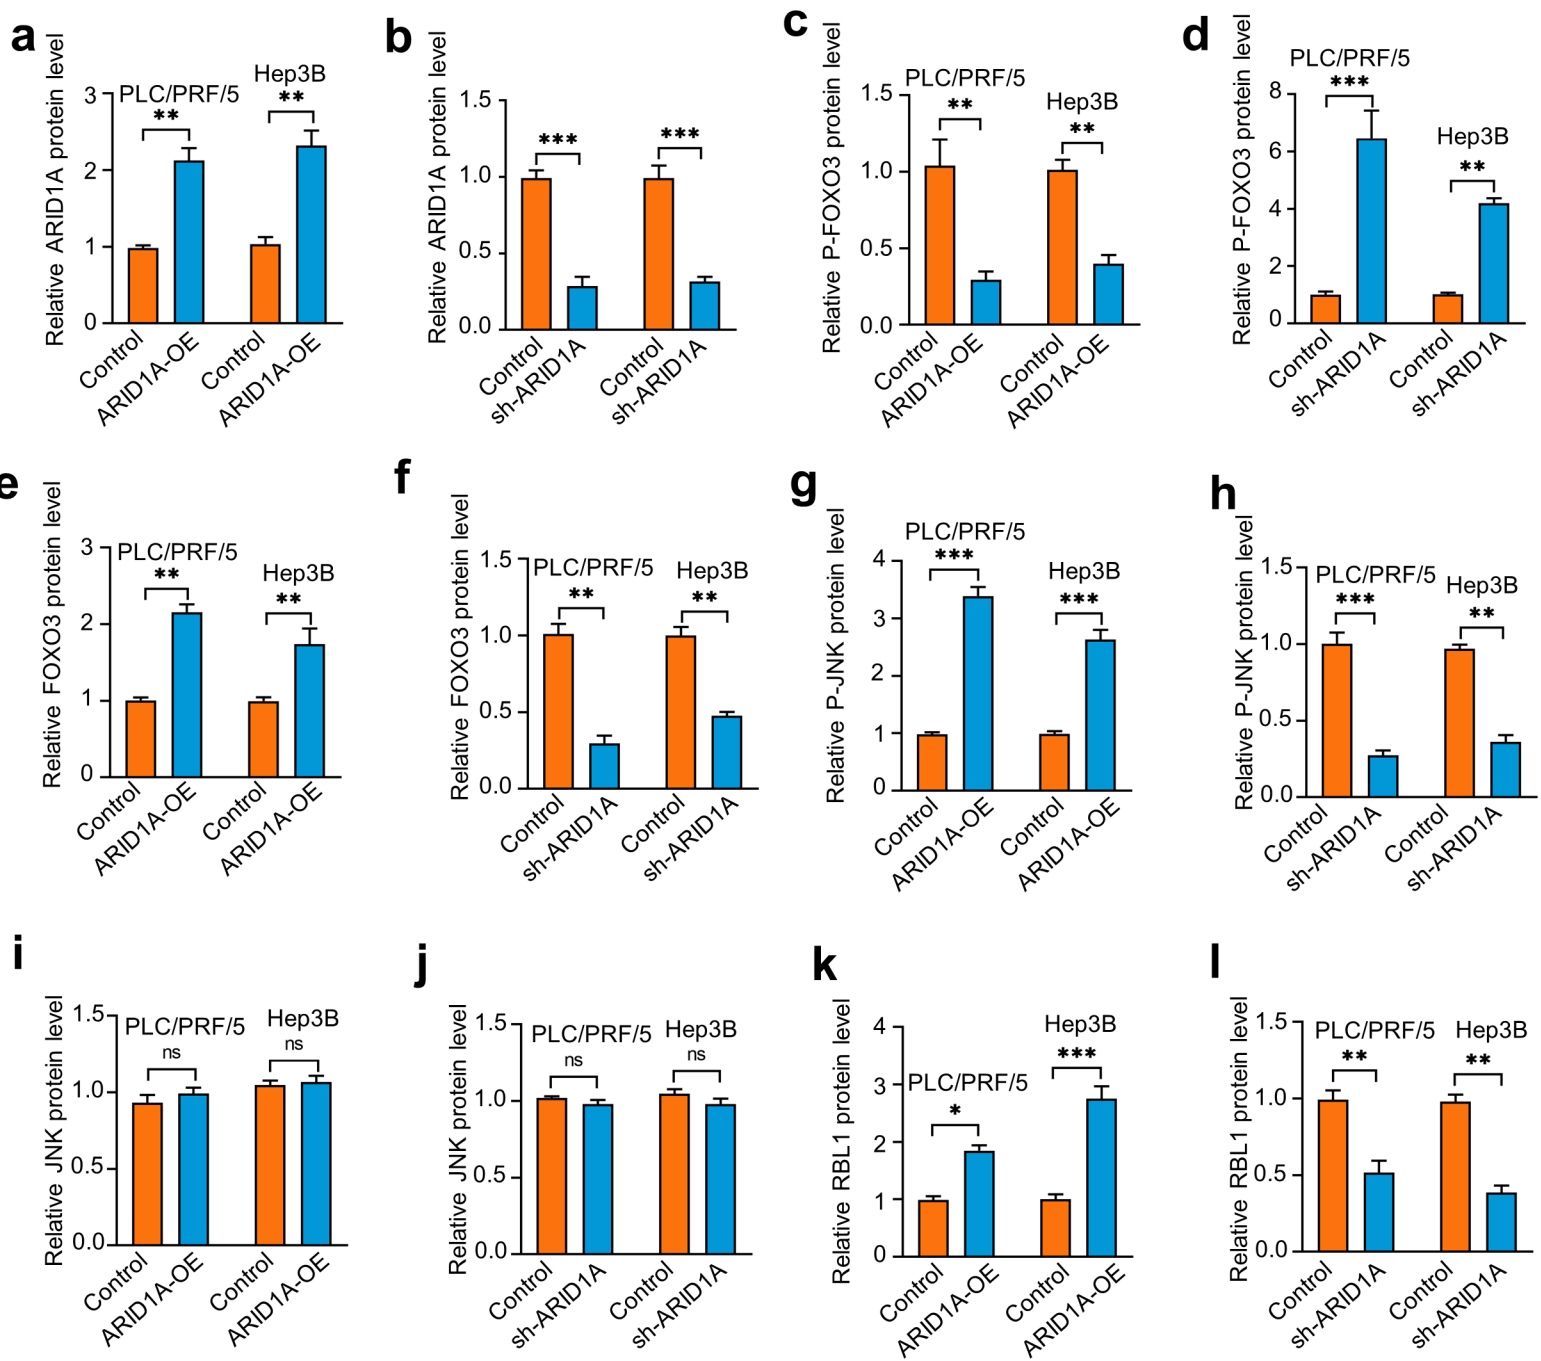

Supplement: mmc5.pdf [file mmc5.pdf]

**a**

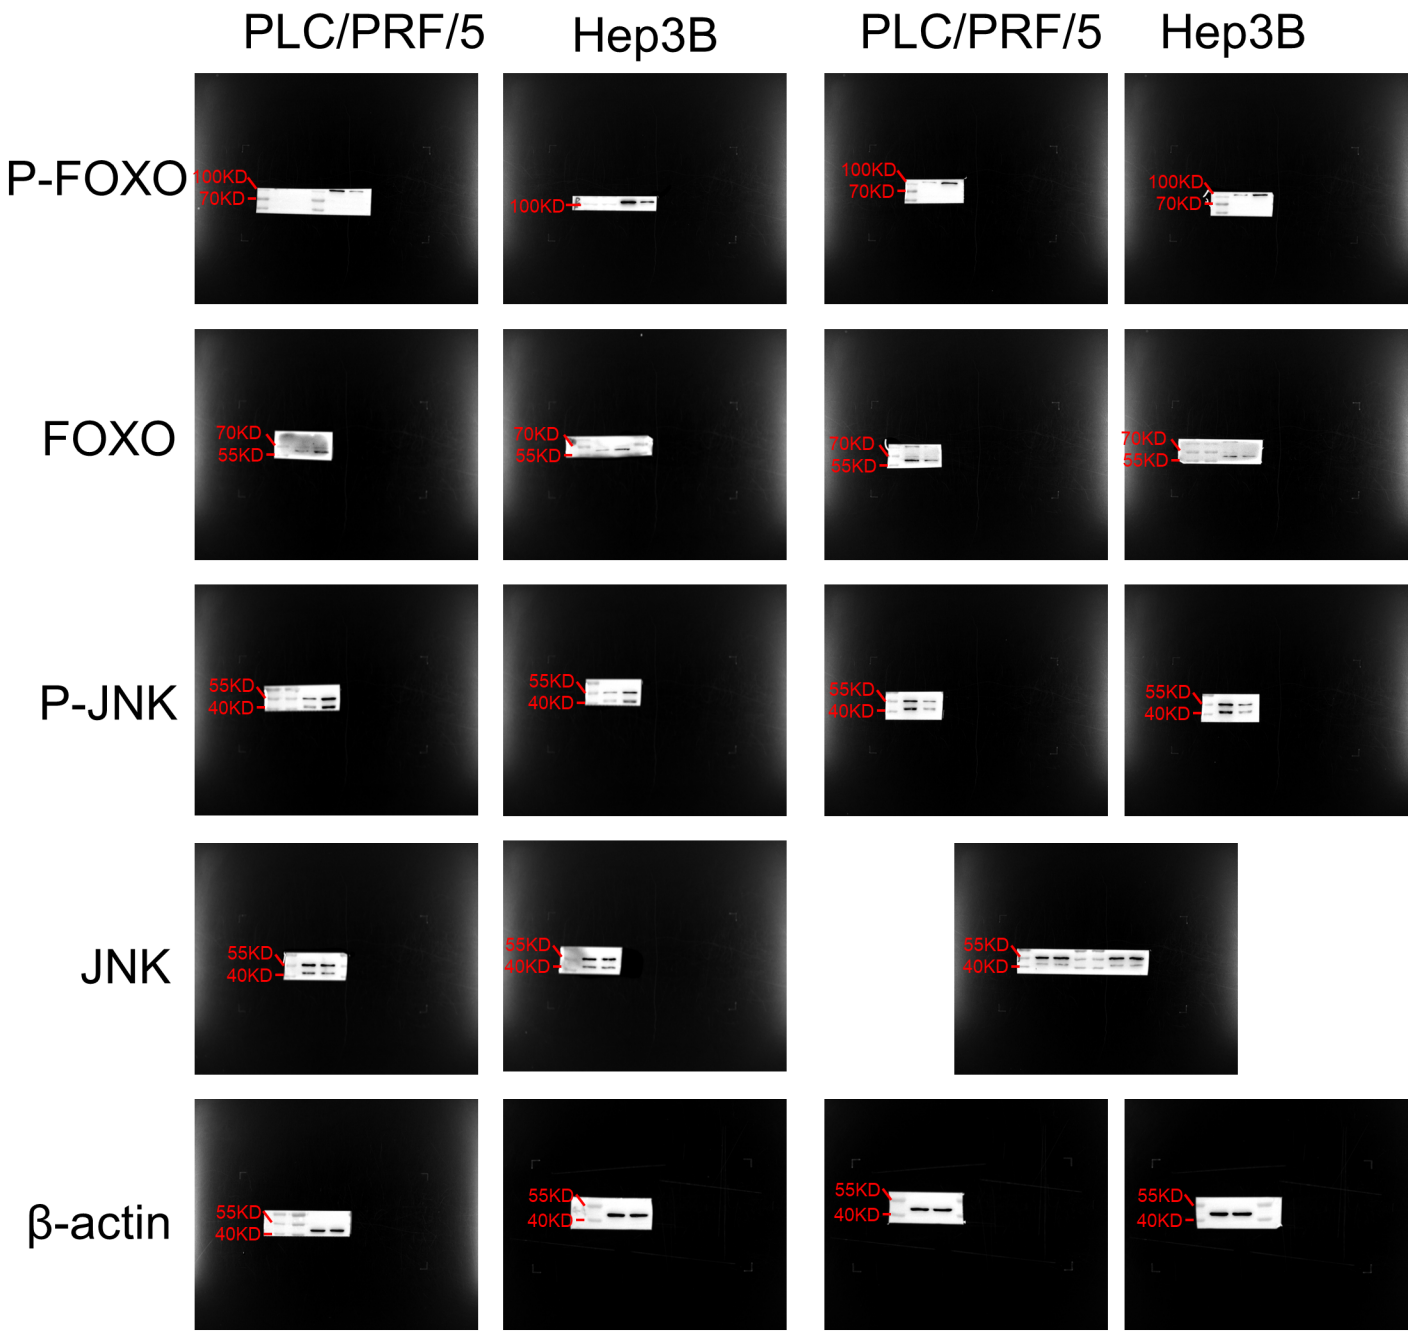

**Figure 5 c**

**b**

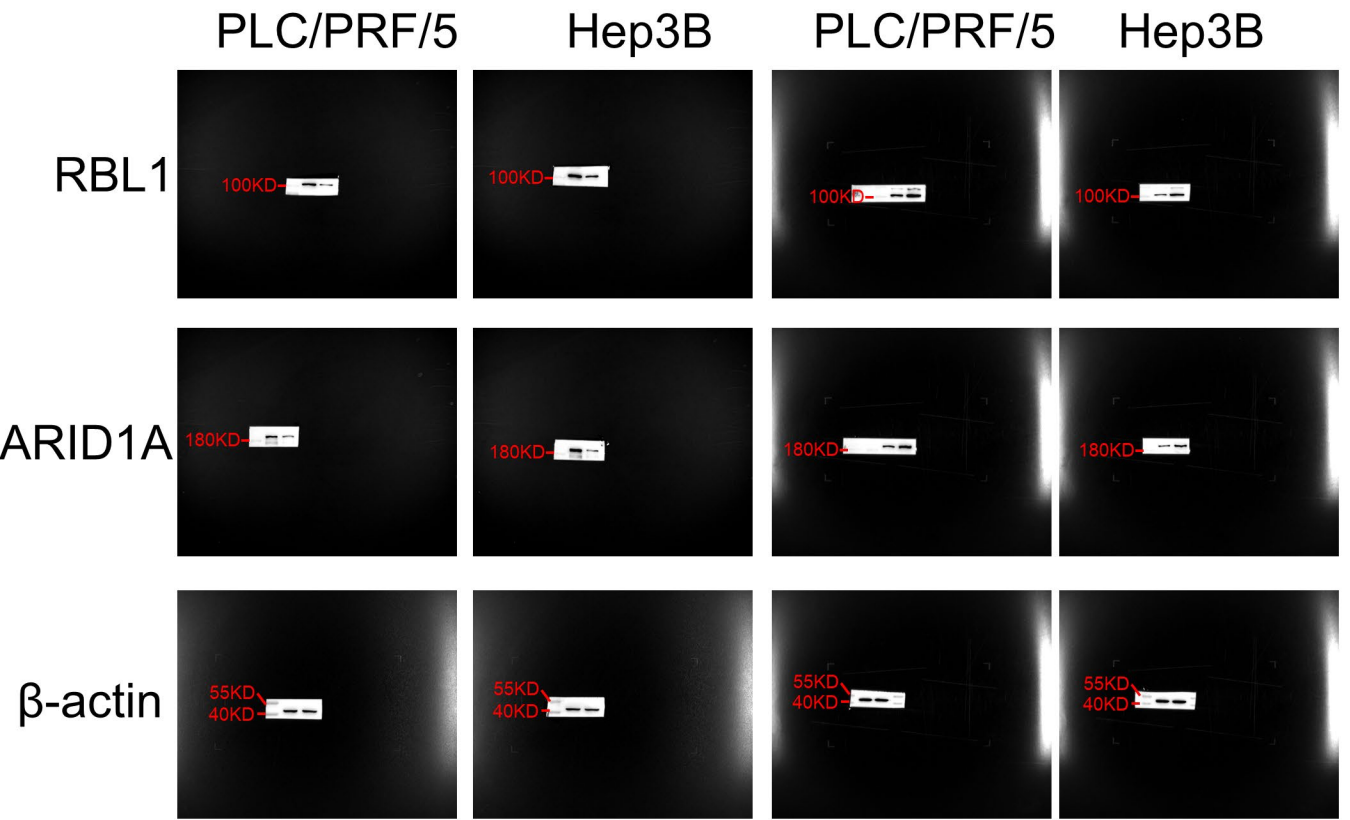

**Figure 5 j**

**C**

PLC/PRF/5

Hep3B

PLC/PRF/5

Hep3B

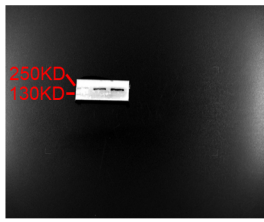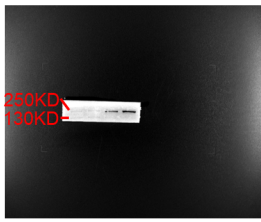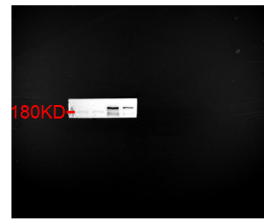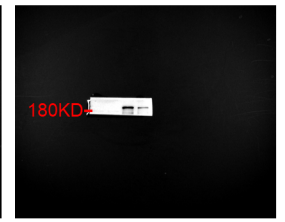

ARID1A

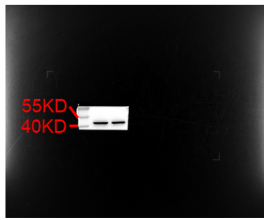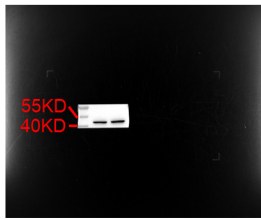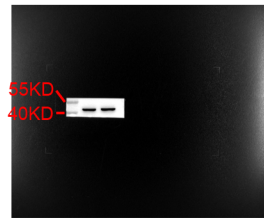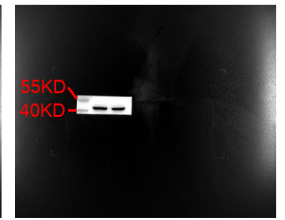

$\beta$ -actin

**Supplementary Figure 3b, d**

Supplement: mmc6.pdf [file mmc6.pdf]
